# Supplementary material for: Sampling and determination of antimony isotopes in airborne particles: an assessment of membrane filter materials
Source: Royal Society of Chemistry journal article supplement (doi:10.1039/d2ja00242f), 2022-01-01
Supplement: d2ja00242f1.pdf [file d2ja00242f1.pdf]

**Supporting Information for**

**Sampling and determination of antimony isotopes in airborne particles: an  
assessment of membrane filter materials**

**Chao Zhang<sup>1, 2, 4</sup>, Guangyi Sun<sup>1,\*</sup>, Xinyu Li<sup>1, 3</sup>, Yunjie Wu<sup>1, 2</sup>, Heng Yao<sup>1</sup>, Jen-How Huang<sup>1</sup>,  
Xinbin Feng<sup>1,\*</sup>**

<sup>1</sup>State Key Laboratory of Environmental Geochemistry, Institute of Geochemistry, Chinese Academy of Sciences, Guiyang 550081, China

<sup>2</sup>School of Earth Sciences, China University of Geosciences, Wuhan, 430074, China

<sup>3</sup>University of Chinese Academy of Sciences, Beijing 100049, China

<sup>4</sup>Institute of Soil and Water Resources and Environmental Science, College of Environmental and Resource Sciences, Zhejiang University, Hangzhou 310058, China

\*Corresponding author: Xinbin Feng ([fengxinbin@vip.skleg.cn](mailto:fengxinbin@vip.skleg.cn)) or Guangyi Sun ([sunguangyi@mail.gyig.ac.cn](mailto:sunguangyi@mail.gyig.ac.cn))

This supporting information includes 7 tables.

Table S1. Total mass of antimony (Sb) in different blank membrane filters (ng/a piece of whole filter).

Table S2. Background values of antimony (Sb) in different blank membrane filters (ng/cm<sup>2</sup>).

Table S3. Background values of antimony (Sb) in different blank membrane filters (ng/g).

Table S4. Total mass of antimony (Sb) in blank Whatman QM membrane filters from different production batches (ng/a piece of whole filter).

Table S5. Blank values of antimony (Sb) in blank Whatman QM membrane filters from different production batches (ng/cm<sup>2</sup>).

Table S6. Blank values of antimony (Sb) in blank Whatman QM membrane filters from different production batches (ng/g).

Table S7. Antimony (Sb) stable isotope ratios of the certified reference materials (CRMs), certified reference materials + membrane filter (MF + CRMs), and (MF + CRMs)<sub>MF subtraction</sub>.

Table S8. Total mass of Sb (ng) in blank membrane filters (MF) and added certified reference materials (CRMs) in the treatment (MF + CRMs).

**Table S1. Total mass of antimony (Sb) in different blank membrane filters (ng/a piece of whole filter).**

| Material | QM membrane filter |        |        |           |        |       | GM membrane filter |        |         |     | PTFE membrane filter |          |                  |        |          |
|----------|--------------------|--------|--------|-----------|--------|-------|--------------------|--------|---------|-----|----------------------|----------|------------------|--------|----------|
| Brand    | Whatman            |        |        | PALL      |        |       | Whatman            |        |         |     | Ahlstrom-Munksjö     |          |                  |        |          |
| Size     | 203 mm × 254 mm    |        |        | Ø = 90 mm |        |       | 203 mm × 254 mm    |        |         |     | Ø = 90 mm            |          | 203 mm × 254 mm  |        |          |
| Batch    | Mixed              |        |        | Mixed     |        |       | No. 20977          |        |         |     | No. 1827-082         |          | No. 7652135-2778 |        |          |
| N1       | n=50               | Averag | 579.42 | n=2       | Averag | 94.82 | n=2                | Averag | 761.24  | n=4 | Averag               | 32046.30 | n=4              | Averag | 20904.38 |
|          |                    | e      |        |           | e      |       |                    | e      |         |     | e                    |          |                  | e      |          |
|          |                    | SD     | 178.59 |           | SD     | 1.04  |                    | SD     | 17.97   |     | SD                   | 701.47   |                  | SD     | 1004.24  |
| N2       |                    |        |        | n=2       | Averag | 98.37 | n=2                | Averag | 1287.56 |     |                      |          |                  |        |          |
|          |                    |        |        |           | e      |       |                    | e      |         | SD  | 320.68               |          |                  |        |          |
| N3       |                    |        |        | n=2       | Averag | 96.23 | n=2                | Averag | 1066.11 |     |                      |          |                  |        |          |
|          |                    |        |        |           | e      |       |                    | e      |         | SD  | 16.10                |          |                  |        |          |
| N4       |                    |        |        |           |        |       | n=2                | Averag | 709.45  |     |                      |          |                  |        |          |
|          |                    |        |        |           |        |       |                    | e      |         | SD  | 51.68                |          |                  |        |          |

N, different boxes;

n, sample number;

SD, standard deviation.

**Table S2. Blank values of antimony (Sb) in different blank membrane filters (ng/cm<sup>2</sup>).**

| Material | QM membrane filter |         |           |      |                 |      | GM membrane filter |         |                  | PTFE membrane filter |         |        |     |         |       |
|----------|--------------------|---------|-----------|------|-----------------|------|--------------------|---------|------------------|----------------------|---------|--------|-----|---------|-------|
| Brand    | Whatman            |         |           | PALL |                 |      | Whatman            |         |                  | Ahlstrom-Munksjö     |         |        |     |         |       |
| Size     | 203 mm × 254 mm    |         | Ø = 90 mm |      | 203 mm × 254 mm |      | Ø = 90 mm          |         | 203 mm × 254 mm  |                      |         |        |     |         |       |
| Batch    | Mixed              |         | Mixed     |      | No. 20977       |      | No. 1827-082       |         | No. 7652135-2778 |                      |         |        |     |         |       |
| N1       | n=50               | Average | 1.12      | n=2  | Average         | 1.49 | n=2                | Average | 1.48             | n=4                  | Average | 503.71 | n=4 | Average | 40.54 |
|          |                    | SD      | 0.35      |      | SD              | 0.02 |                    | SD      | 0.03             |                      | SD      | 11.03  |     | SD      | 1.95  |
| N2       |                    |         |           | n=2  | Average         | 1.55 | n=2                | Average | 2.50             |                      |         |        |     |         |       |
|          |                    |         |           |      | SD              | 0.07 |                    | SD      | 0.62             |                      |         |        |     |         |       |
| N3       |                    |         |           | n=2  | Average         | 1.51 | n=2                | Average | 2.07             |                      |         |        |     |         |       |
|          |                    |         |           |      | SD              | 0.08 |                    | SD      | 0.03             |                      |         |        |     |         |       |
| N4       |                    |         |           |      |                 |      | n=2                | Average | 1.38             |                      |         |        |     |         |       |
|          |                    |         |           |      |                 |      |                    | SD      | 0.10             |                      |         |        |     |         |       |

N, different boxes;

n, sample number;

SD, standard deviation.

**Table S3. Blank values of antimony (Sb) in different blank membrane filters (ng/g).**

| Material | QM membrane filter |        |        |           |        |        | GM membrane filter |        |        |     | PTFE membrane filter |          |                  |        |         |
|----------|--------------------|--------|--------|-----------|--------|--------|--------------------|--------|--------|-----|----------------------|----------|------------------|--------|---------|
| Brand    | Whatman            |        |        | PALL      |        |        | Whatman            |        |        |     | Ahlstrom-Munksjö     |          |                  |        |         |
| Size     | 203 mm × 254 mm    |        |        | Ø = 90 mm |        |        | 203 mm × 254 mm    |        |        |     | Ø = 90 mm            |          | 203 mm × 254 mm  |        |         |
| Batch    | Mixed              |        |        | Mixed     |        |        | No. 20977          |        |        |     | No. 1827-082         |          | No. 7652135-2778 |        |         |
| N1       | n=50               | Averag | 131.91 | n=2       | Averag | 172.33 | n=2                | Averag | 229.48 | n=4 | Averag               | 82170.00 | n=4              | Averag | 7906.69 |
|          |                    | e      |        |           | e      |        |                    | e      |        |     | e                    |          |                  | e      |         |
|          |                    | SD     | 40.37  |           | SD     | 1.18   |                    | SD     | 7.63   |     | SD                   | 1798.65  |                  | SD     | 546.16  |
| N2       |                    |        |        | n=2       | Averag | 180.04 | n=2                | Averag | 372.31 |     |                      |          |                  |        |         |
|          |                    |        |        |           | e      |        |                    | e      |        | e   |                      |          |                  |        |         |
|          |                    |        |        |           | SD     | 5.95   |                    | SD     | 88.02  |     |                      |          |                  |        |         |
| N3       |                    |        |        | n=2       | Averag | 173.76 | n=2                | Averag | 287.68 |     |                      |          |                  |        |         |
|          |                    |        |        |           | e      |        |                    | e      |        | e   |                      |          |                  |        |         |
|          |                    |        |        |           | SD     | 8.61   |                    | SD     | 1.20   |     |                      |          |                  |        |         |
| N4       |                    |        |        |           |        |        | n=2                | Averag | 196.26 |     |                      |          |                  |        |         |
|          |                    |        |        |           |        |        |                    | e      |        | e   |                      |          |                  |        |         |
|          |                    |        |        |           |        |        |                    | SD     | 12.41  |     |                      |          |                  |        |         |

N, different boxes;

n, sample number;

SD, standard deviation.

**Table S4. Total mass of antimony (Sb) in blank Whatman QM membrane filters from different production batches (ng/a piece of whole filter).**

|    | No. 17011224 |         | No. 9578317 |     | No. 9823892 |        | No.16887010 |         | No.16881891 |     |         |        |     |         |        |
|----|--------------|---------|-------------|-----|-------------|--------|-------------|---------|-------------|-----|---------|--------|-----|---------|--------|
| N1 | n=3          | Average | 287.53      | n=4 | Average     | 755.54 | n=3         | Average | 433.73      | n=3 | Average | 495.82 | n=3 | Average | 359.00 |
|    |              | SD      | 25.36       |     | SD          | 51.51  |             | SD      | 29.13       |     | SD      | 96.69  |     | SD      | 89.83  |
| N2 | n=3          | Average | 297.60      | n=4 | Average     | 762.26 | n=3         | Average | 451.60      |     |         |        |     |         |        |
|    |              | SD      | 28.42       |     | SD          | 41.09  |             | SD      | 16.75       |     |         |        |     |         |        |
| N3 |              |         |             | n=4 | Average     | 755.41 | n=3         | Average | 516.27      |     |         |        |     |         |        |
|    |              |         |             |     | SD          | 32.82  |             | SD      | 71.42       |     |         |        |     |         |        |
| N4 |              |         |             | n=4 | Average     | 735.08 | n=3         | Average | 650.00      |     |         |        |     |         |        |
|    |              |         |             |     | SD          | 23.67  |             | SD      | 48.31       |     |         |        |     |         |        |
| N5 |              |         |             | n=4 | Average     | 747.90 | n=3         | Average | 700.47      |     |         |        |     |         |        |
|    |              |         |             |     | SD          | 42.01  |             | SD      | 33.32       |     |         |        |     |         |        |
| N6 |              |         |             |     |             |        | n=3         | Average | 456.67      |     |         |        |     |         |        |
|    |              |         |             |     |             |        |             | SD      | 23.00       |     |         |        |     |         |        |

N, different boxes;

n, sample number;

SD, standard deviation.

**Table S5. Blank values of antimony (Sb) in blank Whatman QM membrane filters from different production batches (ng/cm<sup>2</sup>).**

|    | No. 17011224 |         |      | No. 9578317 |         |      | No. 9823892 |         |      | No.16887010 |         |      | No.16881891 |         |      |
|----|--------------|---------|------|-------------|---------|------|-------------|---------|------|-------------|---------|------|-------------|---------|------|
| N1 | n=3          | Average | 0.56 | n=4         | Average | 1.47 | n=3         | Average | 0.84 | n=3         | Average | 0.96 | n=3         | Average | 0.70 |
|    |              | SD      | 0.05 |             | SD      | 0.10 |             | SD      | 0.06 |             | SD      | 0.19 |             | SD      | 0.17 |
| N2 | n=3          | Average | 0.58 | n=4         | Average | 1.48 | n=3         | Average | 0.88 |             |         |      |             |         |      |
|    |              | SD      | 0.06 |             | SD      | 0.08 |             | SD      | 0.03 |             |         |      |             |         |      |
| N3 |              |         |      | n=4         | Average | 1.47 | n=3         | Average | 1.00 |             |         |      |             |         |      |
|    |              |         |      |             | SD      | 0.06 |             | SD      | 0.14 |             |         |      |             |         |      |
| N4 |              |         |      | n=4         | Average | 1.43 | n=3         | Average | 1.26 |             |         |      |             |         |      |
|    |              |         |      |             | SD      | 0.05 |             | SD      | 0.09 |             |         |      |             |         |      |
| N5 |              |         |      | n=4         | Average | 1.45 | n=3         | Average | 1.36 |             |         |      |             |         |      |
|    |              |         |      |             | SD      | 0.08 |             | SD      | 0.06 |             |         |      |             |         |      |
| N6 |              |         |      |             |         |      | n=3         | Average | 0.89 |             |         |      |             |         |      |
|    |              |         |      |             |         |      |             | SD      | 0.04 |             |         |      |             |         |      |

N, different boxes;

n, sample number;

SD, standard deviation.

**Table S6. Background values of antimony (Sb) in blank Whatman QM membrane filters from different production batches (ng/g).**

|    | No. 17011224 |         |       | No. 9578317 |         |        | No. 9823892 |         |        | No.16887010 |         |        | No.16881891 |         |       |
|----|--------------|---------|-------|-------------|---------|--------|-------------|---------|--------|-------------|---------|--------|-------------|---------|-------|
| N1 | n=3          | Average | 64.82 | n=4         | Average | 169.59 | n=3         | Average | 102.98 | n=3         | Average | 110.18 | n=3         | Average | 79.78 |
|    |              | SD      | 5.85  |             | SD      | 10.57  |             | SD      | 8.64   |             | SD      | 21.49  |             | SD      | 19.96 |
| N2 | n=3          | Average | 66.84 | n=4         | Average | 171.00 | n=3         | Average | 101.09 |             |         |        |             |         |       |
|    |              | SD      | 6.79  |             | SD      | 8.84   |             | SD      | 2.50   |             |         |        |             |         |       |
| N3 |              |         |       | n=4         | Average | 169.51 | n=3         | Average | 122.11 |             |         |        |             |         |       |
|    |              |         |       |             | SD      | 8.15   |             | SD      | 15.42  |             |         |        |             |         |       |
| N4 |              |         |       | n=4         | Average | 165.72 | n=3         | Average | 152.74 |             |         |        |             |         |       |
|    |              |         |       |             | SD      | 4.91   |             | SD      | 12.15  |             |         |        |             |         |       |
| N5 |              |         |       | n=4         | Average | 169.38 | n=3         | Average | 164.96 |             |         |        |             |         |       |
|    |              |         |       |             | SD      | 10.88  |             | SD      | 8.31   |             |         |        |             |         |       |
| N6 |              |         |       |             |         |        | n=3         | Average | 106.10 |             |         |        |             |         |       |
|    |              |         |       |             |         |        |             | SD      | 6.48   |             |         |        |             |         |       |

N, different boxes;

n, sample number;

SD, standard deviation.

**Table S7. Antimony (Sb) stable isotope ratios of the certified reference materials (CRMs), certified reference materials + membrane filter (MF + CRMs), and (MF + CRMs)<sub>MF subtraction</sub>.**

|     | Sample                                    | Recovery (%) | $\epsilon^{123}\text{Sb}$ (‰) |
|-----|-------------------------------------------|--------------|-------------------------------|
|     | NIST 1648a                                |              |                               |
| n=6 | Average                                   | 96%          | 3.12                          |
|     | SD                                        |              | 0.30                          |
|     | MF+NIST 1648a                             |              |                               |
| n=6 | Average                                   |              | 2.50                          |
|     | SD                                        |              | 0.28                          |
|     | (MF+NIST 1648a) <sub>MF subtraction</sub> |              |                               |
| n=6 | Average                                   | 94%          | 2.59                          |
|     | SD                                        |              | 0.29                          |
|     | NIST 2711a                                |              |                               |
| n=8 | Average                                   | 97%          | 1.68                          |
|     | SD                                        |              | 0.22                          |
|     | MF+NIST 2711a                             |              |                               |
| n=6 | Average                                   | 104%         | 1.67                          |
|     | SD                                        |              | 0.19                          |
|     | (MF+NIST 2711a) <sub>MF subtraction</sub> |              |                               |
| n=6 | Average                                   | 97%          | 1.73                          |
|     | SD                                        |              | 0.21                          |
|     | BCR 176R                                  |              |                               |
| n=7 | Average                                   | 90%          | 0.86                          |
|     | SD                                        |              | 0.20                          |
|     | MF+BCR 176R                               |              |                               |
| n=2 | Average                                   |              | 0.42                          |
|     | SD                                        |              | 0.09                          |
|     | (MF+BCR 176R) <sub>MF subtraction</sub>   |              |                               |
| n=2 | Average                                   | 91%          | 0.41                          |
|     | SD                                        |              | 0.09                          |
|     | GBW07405                                  |              |                               |
| n=3 | Average                                   | 98%          | 2.18                          |
|     | SD                                        |              | 0.06                          |
|     | MF+GBW07405                               |              |                               |
| n=3 | Average                                   |              | 2.42                          |
|     | SD                                        |              | 0.35                          |
|     | (MF+GBW07405) <sub>MF subtraction</sub>   |              |                               |
| n=3 | Average                                   | 112%         | 2.47                          |
|     | SD                                        |              | 0.36                          |
|     | GBW07312                                  |              |                               |
| n=3 | Average                                   | 98%          | 2.67                          |
|     | SD                                        |              | 0.08                          |
|     | MF+GBW07312                               |              |                               |
| n=3 | Average                                   |              | 3.07                          |



|     |                                         |     |      |
|-----|-----------------------------------------|-----|------|
|     | SD                                      |     | 0.02 |
|     | (MF+GBW07312) <sub>MF subtraction</sub> |     |      |
| n=3 | Average                                 | 91% | 3.25 |
|     | SD                                      |     | 0.02 |

**Table S8. Total mass of Sb (ng) in blank membrane filters (MF) and added certified reference materials (CRMs) in the treatment (MF + CRMs).**

| Samples       | MF     | CRMs     |
|---------------|--------|----------|
| NIST 1648a+MF | 99.26  | 1667.57  |
| NIST 2711a+MF | 109.46 | 1475.68  |
| BCR 176R+MF   | 130.68 | 14886.96 |
| GBW07405+MF   | 89.73  | 2804.77  |
| GBW07312+MF   | 73.39  | 918.14   |
